# Supplementary material for: A Community-Based Cross-Sectional Survey of Serum Uric Acid Level and Associated Determinants in Freetown, Sierra Leone
Source: Research Square preprint supplement (doi:10.21203/rs.3.rs-6798210/v1), 2025-07-12
Supplement: Supplementary file 1 [file 5182d18069b256a13fcfc0a8.xlsx]

## Sheet: Table S1
Table S1. Differences in uric acid levels across sampled communities
Parameters	Hill Station Old School, Regent (N=199)	Lumpa Community Center, Waterloo (N=250)	Rogbangba Community, Heastings (N=68)	Tombo Community Center, Tombo (N=349)	Upper Mambo, Mambo Village (N=140)	p.overall
Uric acid, μmol/L (median, IQR)	386 (311-523)	314 (250-372)	382 (308-444)	306 (228-384)	456 (365-607)	<0.001
Hyperuricemia, n (%)	87 (43.7%)	33 (13.2%)	32 (47.1%)	68 (19.5%)	81 (57.9%)	<0.001
Bold values indicate statistically significant results (p < 0.05)

## Sheet: Table S2
Table S2. Variables screened by logistic regression models
Variable	Univariate Logistic Regression			Multivariate Logistic Regression
	OR (95%CI)	p		OR (95%CI)	p
Sex, male	1.68 (1.28 ~ 2.20)	<.001		1.70 (1.26 ~ 2.29)	<.001
Marriage Status
Single	1.00 (Reference)			1.00 (Reference)
Married	0.89 (0.63 ~ 1.25)	0.495		0.83 (0.57 ~ 1.20)	0.322
Divorced or Widowed	0.49 (0.28 ~ 0.86)	0.014		0.52 (0.29 ~ 0.95)	0.034
Education Level
Unable to read or write	1.00 (Reference)
Less than junior high school	1.55 (1.09 ~ 2.19)	0.015
High school or above	1.70 (1.24 ~ 2.32)	<.001
Hypertension	0.72 (0.55 ~ 0.96)	0.025
Duration of hypertension
<1 year	1.00 (Reference)
1-3 years	1.75 (0.85 ~ 3.62)	0.132
>3 years	1.35 (0.66 ~ 2.75)	0.406
Taking hypertension medications	0.72 (0.54 ~ 0.96)	0.028		0.73 (0.53 ~ 1.01)	0.056
Diabetes	1.58 (0.75 ~ 3.33)	0.225
Heart disease	0.52 (0.26 ~ 1.04)	0.064		0.52 (0.25 ~ 1.08)	0.078
Kidney disease	0.94 (0.29 ~ 3.01)	0.912
Hyperlipidemia	1.34 (0.39 ~ 4.62)	0.64
Asthma	0.66 (0.26 ~ 1.66)	0.379
Stroke	1.04 (0.62 ~ 1.73)	0.883
Exercise Frequency
Never	1.00 (Reference)			1.00 (Reference)
Occasionally	1.55 (1.08 ~ 2.23)	0.017		1.42 (0.97 ~ 2.08)	0.07
Frequently	1.02 (0.54 ~ 1.92)	0.956		0.93 (0.47 ~ 1.85)	0.842
Smoking	1.18 (0.67 ~ 2.09)	0.563
Drinking	0.83 (0.30 ~ 2.34)	0.729
Drug use	1.48 (0.66 ~ 3.30)	0.338
Diet Evaluation
Poor	1.00 (Reference)
Fair	1.16 (0.56 ~ 2.39)	0.696
Good and above	1.11 (0.56 ~ 2.20)	0.761
Regularly eat vegetables	0.80 (0.60 ~ 1.07)	0.135
Stress
Low	1.00 (Reference)
Medium	0.88 (0.60 ~ 1.29)	0.521
High	0.70 (0.39 ~ 1.26)	0.23
Bmi	0.99 (0.96 ~ 1.02)	0.425
Age	1.00 (0.99 ~ 1.01)	0.724
Income	1.00 (1.00 ~ 1.00)	0.432
SBP	1.01 (1.01 ~ 1.01)	0.034
DBP	1.01 (1.01 ~ 1.02)	0.015		1.02 (1.01 ~ 1.03)	<.001
Body Temperature	0.56 (0.44 ~ 0.71)	<.001		0.56 (0.43 ~ 0.73)	<.001
SpO2	0.93 (0.89 ~ 0.97)	<.001		0.95 (0.91 ~ 0.99)	0.021
Heart rate	1.00 (0.99 ~ 1.01)	0.662
Blood glucose	1.17 (1.05 ~ 1.32)	0.007		1.15 (1.01 ~ 1.30)	0.029
Bold values indicate statistically significant results (p < 0.05)
